# Supplementary material for: Improving maize’s N uptake and N use efficiency by strengthening roots’ absorption capacity when intercropped with legumes
Source: PeerJ. 2021 Jun 23;9:e11658. doi: 10.7717/peerj.11658 (PMC8234926; doi:10.7717/peerj.11658)
Supplement: Supplemental Information 1 — MM, monoculture maize; IMS, intercropped maize with soybean; IMP, intercropped maize with peanut; N0, no N fertilizer; N1, conventional N fertilizer. [file peerj-09-11658-s001.xlsx]

## Sheet: Sheet1
N application	Planting patterns	2017			2018
		STEM	LEAF	KERNEL	STEM	LEAF	KERNEL
N0	MM	10.32	11.9	10.7	5.97	6.71	6.7
N0	MM	10.49	11.12	10.52	6.77	6.41	7.09
N0	MM	10.22	10.99	10.5	6.62	6.3	6.41
N0	IMS	12.66	14.84	12.36	7.83	6.86	7.98
N0	IMS	11.66	14.29	11.56	7.49	6.92	7.6
N0	IMS	12.7	17.16	12.1	8.31	6.82	7.7
N0	IMP	15	15.08	11	9.36	7.01	7.56
N0	IMP	14.2	13.85	11.56	9.51	6.53	7.98
N0	IMP	14.4	12.18	10.98	9.06	6.06	7.54
N1	MM	12.36	14.43	12.79	8.7	8.55	8.53
N1	MM	11.7	15.03	12.99	9.01	8.44	9.02
N1	MM	12.11	14.94	13.17	8.73	8.46	8.5
N1	IMS	11.32	15.8	12.59	10.23	7.8	8.48
N1	IMS	12.12	15.6	12.6	9.84	8.05	7.73
N1	IMS	11.89	15.6	12.45	9.39	7.73	8.73
N1	IMP	14.52	16.46	11.69	8.44	8.67	8.28
N1	IMP	13.96	17.47	11.75	9.26	8.92	8.91
N1	IMP	15.39	13.95	11.25	8.27	8.85	7.51
