# Supplementary material for: Improving maize’s N uptake and N use efficiency by strengthening roots’ absorption capacity when intercropped with legumes
Source: PeerJ. 2021 Jun 23;9:e11658. doi: 10.7717/peerj.11658 (PMC8234926; doi:10.7717/peerj.11658)
Supplement: Supplemental Information 2 — MM, monoculture maize; IMS, intercropped maize with soybean; IMP, intercropped maize with peanut; N0, no N fertilizer; N1, conventional N fertilizer. [file peerj-09-11658-s002.xlsx]

## Sheet: Sheet1
N application	Planting patterns	2017			2018
		STEM	LEAF	KERNEL	STEM	LEAF	KERNEL
N0	MM	37.91	18.65	112.45	45.36	18.38	107.08
N0	MM	38.45	19.31	113.51	45.81	18.35	109.87
N0	MM	38.43	18.98	116.1	45.8	19.92	109.87
N0	IMS	40.21	23.78	143.86	52.59	23.67	189.89
N0	IMS	40.54	23.57	155.77	54.6	23.21	187.85
N0	IMS	40.37	24.41	154.91	52.92	21.43	189.29
N0	IMP	42.65	22.26	190.91	58.16	24.19	188.01
N0	IMP	43.1	26	182.24	58.34	24.55	186.2
N0	IMP	42.18	28.04	191.64	58.09	22.41	187.61
N1	MM	41.54	20.27	119.07	50.2	20.15	143.97
N1	MM	42.23	19.54	118.57	50.06	21.43	146.78
N1	MM	42.25	19.9	120.38	50.34	20.79	146.31
N1	IMS	49.33	25.27	196.31	57.74	24.92	225.32
N1	IMS	49.18	25.18	192.14	57.17	24.16	224.56
N1	IMS	49.25	25.36	194.84	57.45	23.05	223.38
N1	IMP	47.79	25.31	202.61	70.06	28.07	228.17
N1	IMP	47.93	24.68	203.67	70.1	28.13	231.18
N1	IMP	47.64	28.17	213.94	70.32	28.86	227.98
