# Supplementary material for: Improving maize’s N uptake and N use efficiency by strengthening roots’ absorption capacity when intercropped with legumes
Source: PeerJ. 2021 Jun 23;9:e11658. doi: 10.7717/peerj.11658 (PMC8234926; doi:10.7717/peerj.11658)
Supplement: Supplemental Information 4 — MM, monoculture maize; IMS, intercropped maize with soybean; IMP, intercropped maize with peanut; N0, no N fertilizer; N1, conventional N fertilizer; P1, the inter-row of maize; P2, intra-row of maize; P3, the adjacent row of maize and legume; P4, intra-row of legume; P5, inter-row of legume. [file peerj-09-11658-s004.xlsx]

## Sheet: Sheet1
N application	Planting patterns	Root sampling sites	Soil depth (cm)	2017			2018
				I	II	III	I	II	III
N1	MM	P1	0-20	13.958	15.637	14.798	14.62	16.541	15.467
N1	MM	P1	20-40	3.213	3.213	3.213	11.308	13.561	14.654
N1	MM	P1	40-60	0	0	0	8.298	9.409	10.429
N1	MM	P1	60-80	0	0	0	0	0	0
N1	MM	P1	80-100	0	0	0	0	0	0
N1	MM	P2	0-20	551.951	524.68	538.316	593.297	621.143	606.49
N1	MM	P2	20-40	13.328	15.357	14.343	64.729	71.884	70.523
N1	MM	P2	40-60	24.617	28.31	26.463	29.101	28.723	28.192
N1	MM	P2	60-80	0	0	0	0	0	0
N1	MM	P2	80-100	0	0	0	0	0	0
N1	MM	P3	0-20	13.958	15.637	14.798	14.62	16.541	15.467
N1	MM	P3	20-40	3.213	3.213	3.213	11.308	13.561	14.654
N1	MM	P3	40-60	0	0	0	8.298	9.409	10.429
N1	MM	P3	60-80	0	0	0	0	0	0
N1	MM	P3	80-100	0	0	0	0	0	0
N1	IMS	P1	0-20	7.651	6.477	7.064	22.663	25.68	22.101
N1	IMS	P1	20-40	1.674	2.099	1.386	10.025	12.621	15.361
N1	IMS	P1	40-60	0	0	0	8.465	12.791	9.744
N1	IMS	P1	60-80	0	0	0	0	0	0
N1	IMS	P1	80-100	0	0	0	0	0	0
N1	IMS	P2	0-20	664.412	627.129	645.77	703.33	715.9	710.129
N1	IMS	P2	20-40	37.792	34.826	36.309	52.481	66.939	57.892
N1	IMS	P2	40-60	10.808	11.496	11.152	40.638	38.221	42.467
N1	IMS	P2	60-80	0	0	0	0	0	0
N1	IMS	P2	80-100	0	0	0	0	0	0
N1	IMS	P3	0-20	10.151	12.4	11.276	28.053	29.059	28.649
N1	IMS	P3	20-40	7.471	7.317	7.394	36.428	40.586	38.689
N1	IMS	P3	40-60	0	0	0	20.354	22.747	18.556
N1	IMS	P3	60-80	0	0	0	0	0	0
N1	IMS	P3	80-100	0	0	0	0	0	0
N1	IMS	P4	0-20	6.959	6.959	6.959	8.163	11.623	9.356
N1	IMS	P4	20-40	1.188	1.188	1.188	24.014	22.568	27.449
N1	IMS	P4	40-60	0	0	0	12.561	11.656	16.36
N1	IMS	P4	60-80	0	0	0	0	0	0
N1	IMS	P4	80-100	0	0	0	0	0	0
N1	IMS	P5	0-20	4.17	4.154	4.162	4.798	4.026	4.267
N1	IMS	P5	20-40	0.983	1.251	0.866	12.163	10.704	15.781
N1	IMS	P5	40-60	0	0	0	11.56	10.964	11.494
N1	IMS	P5	60-80	0	0	0	0	0	0
N1	IMS	P5	80-100	0	0	0	0	0	0
N1	IMP	P1	0-20	19.882	21.763	20.822	22.823	21.761	23.146
N1	IMP	P1	20-40	10.669	8.12	9.394	12.605	12.696	13.519
N1	IMP	P1	40-60	0	0	0	4.335	4.521	4.748
N1	IMP	P1	60-80	0	0	0	0	0	0
N1	IMP	P1	80-100	0	0	0	0	0	0
N1	IMP	P2	0-20	803.484	685.899	744.691	725.288	730.847	729.098
N1	IMP	P2	20-40	34.282	47.036	40.659	85.847	92.271	99.312
N1	IMP	P2	40-60	20.188	19.462	19.825	32.048	38.791	28.476
N1	IMP	P2	60-80	0	0	0	0	0	0
N1	IMP	P2	80-100	0	0	0	0	0	0
N1	IMP	P3	0-20	41.253	38.991	40.122	31.297	30.71	26.628
N1	IMP	P3	20-40	3.813	7.583	5.698	16.049	18.368	15.819
N1	IMP	P3	40-60	0	0	0	11.765	7.078	10.452
N1	IMP	P3	60-80	0	0	0	0	0	0
N1	IMP	P3	80-100	0	0	0	0	0	0
N1	IMP	P4	0-20	20.603	21.396	20.999	18.416	18.452	19.643
N1	IMP	P4	20-40	10.378	7.245	8.811	8.082	8.27	8.12
N1	IMP	P4	40-60	0	0	0	12.179	11.312	13.954
N1	IMP	P4	60-80	0	0	0	0	0	0
N1	IMP	P4	80-100	0	0	0	0	0	0
N1	IMP	P5	0-20	9.306	3.759	3.533	2.186	2.316	1.955
N1	IMP	P5	20-40	2.233	3.744	2.755	5.024	4.952	5.118
N1	IMP	P5	40-60	0	0	0	6.299	7.352	8.937
N1	IMP	P5	60-80	0	0	0	0	0	0
N1	IMP	P5	80-100	0	0	0	0	0	0
N0	MM	P1	0-20	14.525	13.891	14.208	12.116	13.507	10.788
N0	MM	P1	20-40	4.388	5.716	5.052	14.58	12.768	13.588
N0	MM	P1	40-60	0	0	0	7.681	8.214	7.358
N0	MM	P1	60-80	0	0	0	0	0	0
N0	MM	P1	80-100	0	0	0	0	0	0
N0	MM	P2	0-20	439.545	539.864	489.704	444.675	507.494	497.002
N0	MM	P2	20-40	41.282	38.418	39.85	55.055	70.257	62.158
N0	MM	P2	40-60	19.82	27.171	23.496	26.021	26.99	21.815
N0	MM	P2	60-80	0	0	0	0	0	0
N0	MM	P2	80-100	0	0	0	0	0	0
N0	MM	P3	0-20	14.525	13.891	14.208	12.116	13.507	10.788
N0	MM	P3	20-40	4.388	5.716	5.052	14.58	12.768	13.588
N0	MM	P3	40-60	0	0	0	7.681	8.214	7.358
N0	MM	P3	60-80	0	0	0	0	0	0
N0	MM	P3	80-100	0	0	0	0	0	0
N0	IMS	P1	0-20	5.086	6.783	5.934	20.103	18.793	19.26
N0	IMS	P1	20-40	3.028	1.448	2.238	13.459	15.381	18.51
N0	IMS	P1	40-60	0	0	0	10.873	12.698	9.517
N0	IMS	P1	60-80	0	0	0	0	0	0
N0	IMS	P1	80-100	0	0	0	0	0	0
N0	IMS	P2	0-20	691.681	504.046	597.864	681.863	672.448	668.615
N0	IMS	P2	20-40	26.493	37.954	32.223	56.636	64.755	67.012
N0	IMS	P2	40-60	12.681	16.249	14.465	26.838	38.407	33.26
N0	IMS	P2	60-80	0	0	0	0	0	0
N0	IMS	P2	80-100	0	0	0	0	0	0
N0	IMS	P3	0-20	19.607	14.995	17.301	29.13	27.892	25.907
N0	IMS	P3	20-40	9.812	9.177	8.995	24.072	24.934	25.629
N0	IMS	P3	40-60	0	0	0	25.968	25.343	17.011
N0	IMS	P3	60-80	0	0	0	0	0	0
N0	IMS	P3	80-100	0	0	0	0	0	0
N0	IMS	P4	0-20	4.418	4.418	4.418	9.565	9.939	8.649
N0	IMS	P4	20-40	1.355	1.355	1.355	22.038	21.892	24.185
N0	IMS	P4	40-60	0	0	0	10.17	10.643	9.251
N0	IMS	P4	60-80	0	0	0	0	0	0
N0	IMS	P4	80-100	0	0	0	0	0	0
N0	IMS	P5	0-20	1.662	2.592	2.127	3.826	4.026	3.654
N0	IMS	P5	20-40	8.823	4.79	6.807	13.197	15.148	16.533
N0	IMS	P5	40-60	0	0	0	6.035	5.727	5.123
N0	IMS	P5	60-80	0	0	0	0	0	0
N0	IMS	P5	80-100	0	0	0	0	0	0
N0	IMP	P1	0-20	17.715	18.865	18.29	13.269	15.86	16.29
N0	IMP	P1	20-40	3.121	7.038	5.08	10.258	9.686	11.444
N0	IMP	P1	40-60	0	0	0	5.521	4.313	4.324
N0	IMP	P1	60-80	0	0	0	0	0	0
N0	IMP	P1	80-100	0	0	0	0	0	0
N0	IMP	P2	0-20	467.262	571.709	519.486	676.14	683.804	661.251
N0	IMP	P2	20-40	28.276	32.591	30.433	45.335	44.488	39.205
N0	IMP	P2	40-60	15.945	22.353	19.149	25.833	27.322	25.53
N0	IMP	P2	60-80	0	0	0	0	0	0
N0	IMP	P2	80-100	0	0	0	0	0	0
N0	IMP	P3	0-20	28.44	28.829	28.634	19.834	21.386	23.8
N0	IMP	P3	20-40	13.445	17.953	15.699	19.166	15.093	17.754
N0	IMP	P3	40-60	0	0	0	11.153	16.878	15.833
N0	IMP	P3	60-80	0	0	0	0	0	0
N0	IMP	P3	80-100	0	0	0	0	0	0
N0	IMP	P4	0-20	16.26	10.02	13.14	14.023	15.333	13.738
N0	IMP	P4	20-40	8.923	8.026	8.475	12.973	11.591	12.035
N0	IMP	P4	40-60	0	0	0	4.96	4.064	4.041
N0	IMP	P4	60-80	0	0	0	0	0	0
N0	IMP	P4	80-100	0	0	0	0	0	0
N0	IMP	P5	0-20	5.838	5.226	5.532	4.649	5.464	4.639
N0	IMP	P5	20-40	4.339	3.414	3.877	5.753	6.191	6.015
N0	IMP	P5	40-60	0	0	0	2.182	2.322	1.915
N0	IMP	P5	60-80	0	0	0	0	0	0
N0	IMP	P5	80-100	0	0	0	0	0	0
