# Supplementary material for: Improving maize’s N uptake and N use efficiency by strengthening roots’ absorption capacity when intercropped with legumes
Source: PeerJ. 2021 Jun 23;9:e11658. doi: 10.7717/peerj.11658 (PMC8234926; doi:10.7717/peerj.11658)
Supplement: Supplemental Information 5 — MM, monoculture maize; IMS, intercropped maize with soybean; IMP, intercropped maize with peanut; N0, no N fertilizer; N1, conventional N fertilizer. [file peerj-09-11658-s005.xlsx]

## Sheet: Sheet1
N application	Planting patterns	SOD(IU g-1)			CAT (IU g-1)			GSH (μg g-1)
		I	II	III	I	II	III	I	II	III
N0	MM	9.39	11.51	9.21	11.53	13.58	13.86	26.74	24.9	29.96
N0	IMS	16.27	17.21	17.05	23.93	20.57	24.81	36.19	36.93	38.16
N0	IMP	21.91	21.27	23.99	28.59	30	29.6	40.4	38.22	40.38
N1	MM	12.21	14.32	13.07	19.54	18.12	16.08	35	36.8	34.54
N1	IMS	19.36	18.49	17	28.59	30	32.1	39.92	42.15	40.92
N1	IMP	23.48	24.15	22.27	35.12	37.65	35.23	42.21	43.49	41.65
