# Supplementary material for: Improving maize’s N uptake and N use efficiency by strengthening roots’ absorption capacity when intercropped with legumes
Source: PeerJ. 2021 Jun 23;9:e11658. doi: 10.7717/peerj.11658 (PMC8234926; doi:10.7717/peerj.11658)
Supplement: Supplemental Information 6 — MM, monoculture maize; IMS, intercropped maize with soybean; IMP, intercropped maize with peanut; N0, no N fertilizer; N1, conventional N fertilizer; V12, the twelve-leaf-stage of maize; R1, the silking-stage of maize; R3, the milk-stage of maize. [file peerj-09-11658-s006.xlsx]

## Sheet: Sheet1
Years	N application	Planting patterns	V12	R1	R3
2017	N0	MM	8.67	11.57	8.15
2017	N0	MM	9.06	11.59	8.53
2017	N0	MM	8.42	11.6	8.8
2017	N0	IMS	15.37	17.67	8.1
2017	N0	IMS	14.26	17.25	9.09
2017	N0	IMS	16.2	16.35	8.6
2017	N0	IMP	18.31	19.52	9.91
2017	N0	IMP	16.52	19.9	9.4
2017	N0	IMP	18.05	19.71	9.65
2017	N1	MM	9.29	14.69	9.25
2017	N1	MM	9.1	15.17	9.79
2017	N1	MM	8.35	14.93	10.29
2017	N1	IMS	16.23	19.34	9.12
2017	N1	IMS	15.68	18.34	10.45
2017	N1	IMS	15.56	18.84	9.71
2017	N1	IMP	18.02	22.04	12.22
2017	N1	IMP	17.96	21.39	13.52
2017	N1	IMP	18.56	22.7	12.87
2018	N0	MM	10.7	13.16	4.2
2018	N0	MM	10.56	13.24	3.73
2018	N0	MM	10.54	11.46	3.96
2018	N0	IMS	13.27	15.78	5.32
2018	N0	IMS	14.27	14.87	6.1
2018	N0	IMS	13.18	15.68	6.36
2018	N0	IMP	14.48	15.42	5.3
2018	N0	IMP	14.51	15.76	6.72
2018	N0	IMP	14.46	15.59	6.54
2018	N1	MM	12.8	13.55	5.92
2018	N1	MM	13	14.14	4.15
2018	N1	MM	12.81	14.07	5.03
2018	N1	IMS	15.05	15.89	6.97
2018	N1	IMS	15.29	16.56	6.95
2018	N1	IMS	14.52	16.62	7.28
2018	N1	IMP	16.52	16.46	7.11
2018	N1	IMP	15.55	16.54	7.64
2018	N1	IMP	15.72	16.5	7.9
