# Supplementary material for: Improving maize’s N uptake and N use efficiency by strengthening roots’ absorption capacity when intercropped with legumes
Source: PeerJ. 2021 Jun 23;9:e11658. doi: 10.7717/peerj.11658 (PMC8234926; doi:10.7717/peerj.11658)
Supplement: Supplemental Information 7 — MM, monoculture maize; IMS, intercropped maize with soybean; IMP, intercropped maize with peanut; N0, no N fertilizer; N1, conventional N fertilizer. [file peerj-09-11658-s007.xlsx]

## Sheet: Sheet1
N application	Planting patterns	I	II	III
N0	MM	26.1	27.8	29.4
N0	IMS	51.6	53.9	52.5
N0	IMP	50.4	58.3	60
N1	MM	34.1	32.1	38.4
N1	IMS	63.2	61.1	69.5
N1	IMP	63.5	69.4	67.1
